# Supplementary material for: Intercalation, decomposition, entrapment – a new route to graphene nanobubbles
Source: Royal Society of Chemistry journal article supplement (doi:10.1039/d0cp00592d), 2020-01-01
Supplement: d0cp00592d1.pdf [file d0cp00592d1.pdf]

## Supporting Information

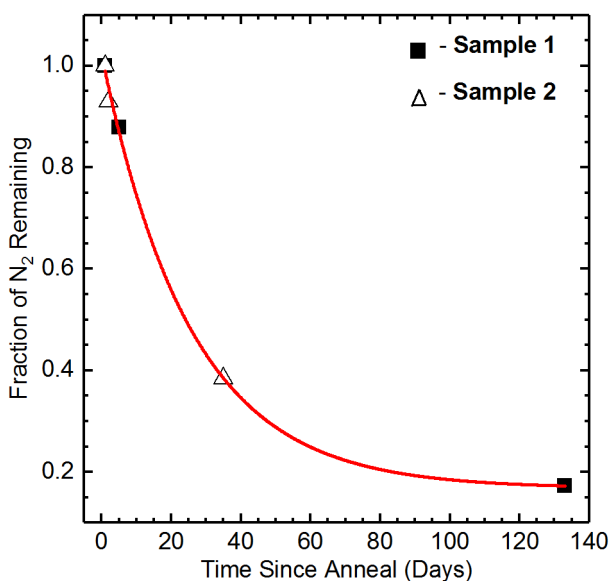

Figure S1. A graphical representation of the life-span of N<sub>2</sub> filled GNBs from two separate samples (1 and 2) after prolonged exposure to atmospheric conditions. Day 0 represents the first measurement after NH<sub>3</sub> treatment.

### **Graphene nanobubble life-span**

XPS results of two separate NH<sub>3</sub> treated samples (labelled Sample 1 and Sample 2 in Figure S1) over several months lead us to believe that the GNBs persist in this time however N<sub>2</sub> is released gradually, following an exponential fit. Evidence of the N<sub>2</sub> peak was still visible over four months after the initial treatment, reduced from ~4.9 at. % on Day 0 to 0.8 at. % on Day 133. Fraction of N<sub>2</sub> was calculated using N<sub>A</sub> atomic percentage relative to the C 1s sp<sup>2</sup> on Day 0 as 1.0 (~4.9 at. %), and consequent measurements were measured in relation to that percentage.

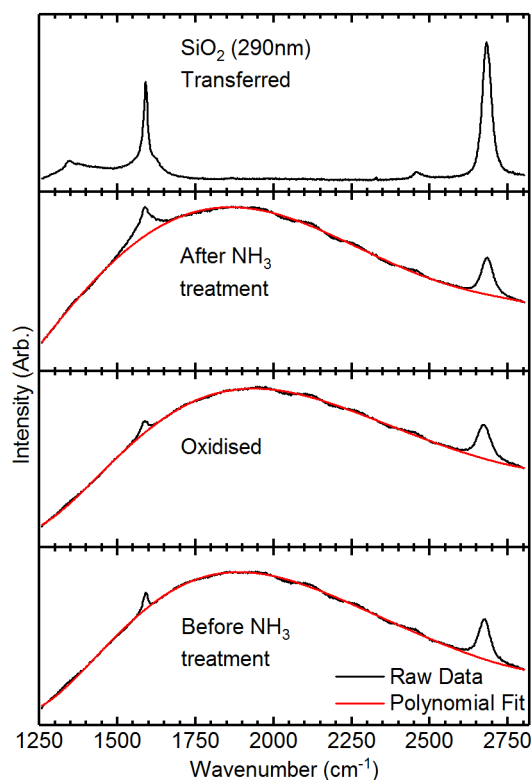

Figure S2. Raw Raman data collected from CVD graphene samples, prior to subtraction. A 6<sup>th</sup> order polynomial has been fitted to the photoluminescent background of the Cu substrate. The appearance of the *G* (~1580 cm<sup>-1</sup>) and *2D* (~2700 cm<sup>-1</sup>) peaks in each scan are characteristic to graphene.

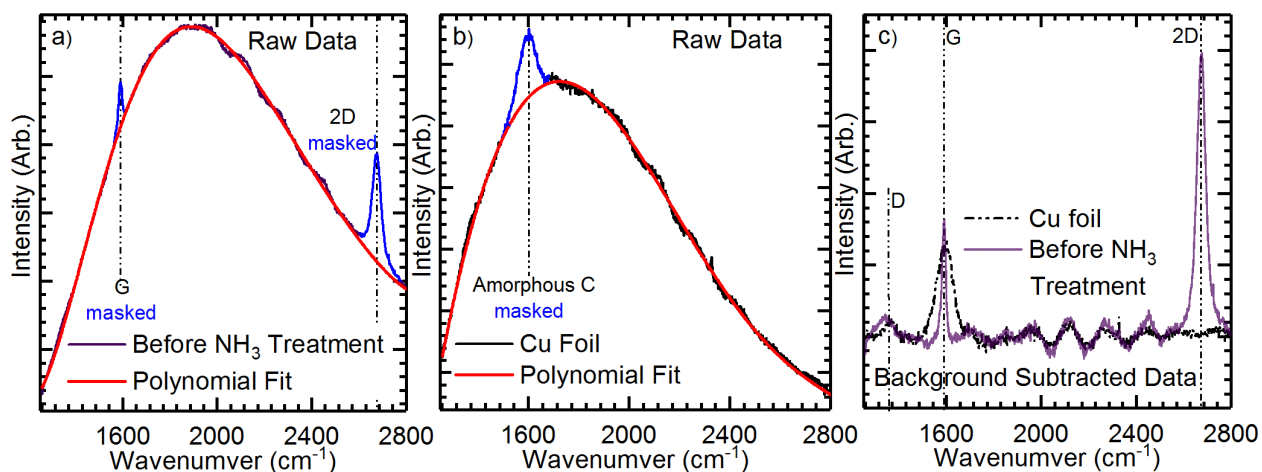

Figure S3. Raman spectra of (a) before NH<sub>3</sub> treatment of graphene on a Cu substrate, (b) Cu foil before background subtraction and (c) after background subtraction. The photoluminescent background in (a) and (b) is fitted with a 6<sup>th</sup> order polynomial. Blue indicates masking of peaks.

## **Raman analysis**

Subtraction of the photoluminescent background caused by the Cu substrate was applied to all graphene/Cu sample datasets. This was done by masking the *D*, *G* and *2D* peaks (Figure S3, blue) and fitting the remaining data with a 6th order polynomial (red) (Figure S2 and S3a). Using this fit, the background was removed through a Python program. The research made use of the following Python packages: NumPy<sup>1</sup>, Matplotlib<sup>2</sup>, AstroPy<sup>3,4</sup>. The oscillating component of the background is due to the photoluminescent background, which can also be seen in the spectrum of Cu foil (Figure S3b-c) and is present in all graphene on Cu spectra. The broad peak at  $\sim 1600\text{cm}^{-1}$  is attributed to amorphous carbon<sup>5</sup> on the surface of the Cu foil (Figure S3b-c). Comparison of background subtracted data of both the before NH<sub>3</sub> treatment graphene/Cu (purple) and Cu foil (black, dashed) demonstrate that the broad peak seen at  $\sim 1350\text{ cm}^{-1}$  is likely due to the Cu photoluminescent background, as it can be seen in both spectra (Figure S3c).

## **References**

- (1) Oliphant, T. {NumPy}: A Guide to {NumPy}. Trelgol Publishing 2006.
- (2) Hunter, J. D. Matplotlib: A 2D Graphics Environment. *Comput. Sci. Eng.* **2007**, *9* (3), 90–95.
- (3) Astropy Collaboration; Price-Whelan, A. ~M.; Sip\H ocz, B. ~M.; Günther, H. ~M.; Lim, P. ~L.; Crawford, S. ~M.; Conseil, S.; Shupe, D. ~L.; Craig, M. ~W.; Dencheva, N.; et al. The Astropy Project: Building an Open-Science Project and Status of the v2.0 Core Package. *AJ* **2018**, *156*, 123.
- (4) Astropy Collaboration; Robitaille, T. ~P.; Tollerud, E. ~J.; Greenfield, P.; Droettboom, M.; Bray, E.; Aldcroft, T.; Davis, M.; Ginsburg, A.; Price-Whelan, A. ~M.; et al. Astropy: A Community Python Package for Astronomy. *AAP* **2013**, *558*, A33.
- (5) Dychalska, A.; Popielarski, P.; Franków, W.; Fabisiak, K.; Paprocki, K.; Szybowicz, M.

Study of CVD Diamond Layers with Amorphous Carbon Admixture by Raman Scattering Spectroscopy. *Mater. Sci. Pol.* **2015**, 33 (4), 799–805.
